# Supplementary material
Source: PubMed Central journal article supplement (PMC1253561)

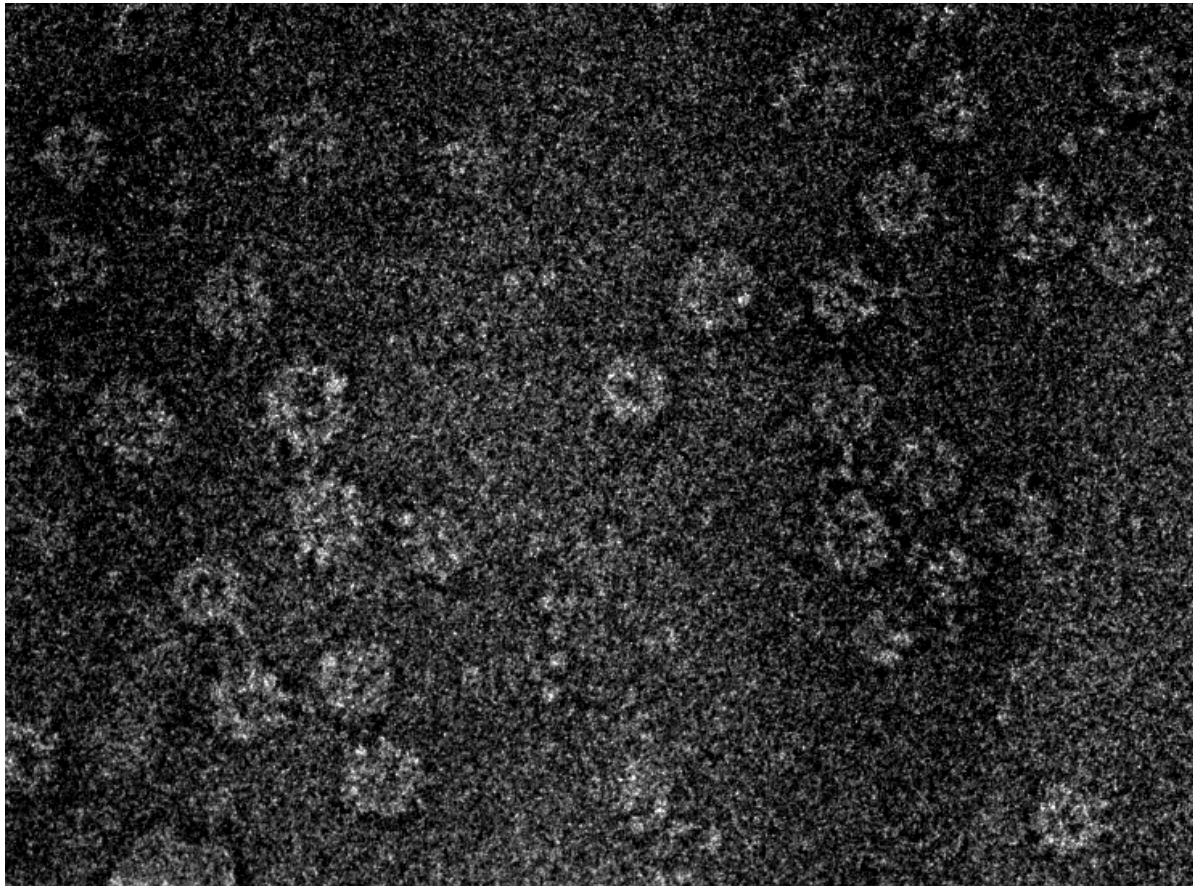

Supplement: pnas_0505062102_1.pdf [file pnas_0505062102_1.pdf]

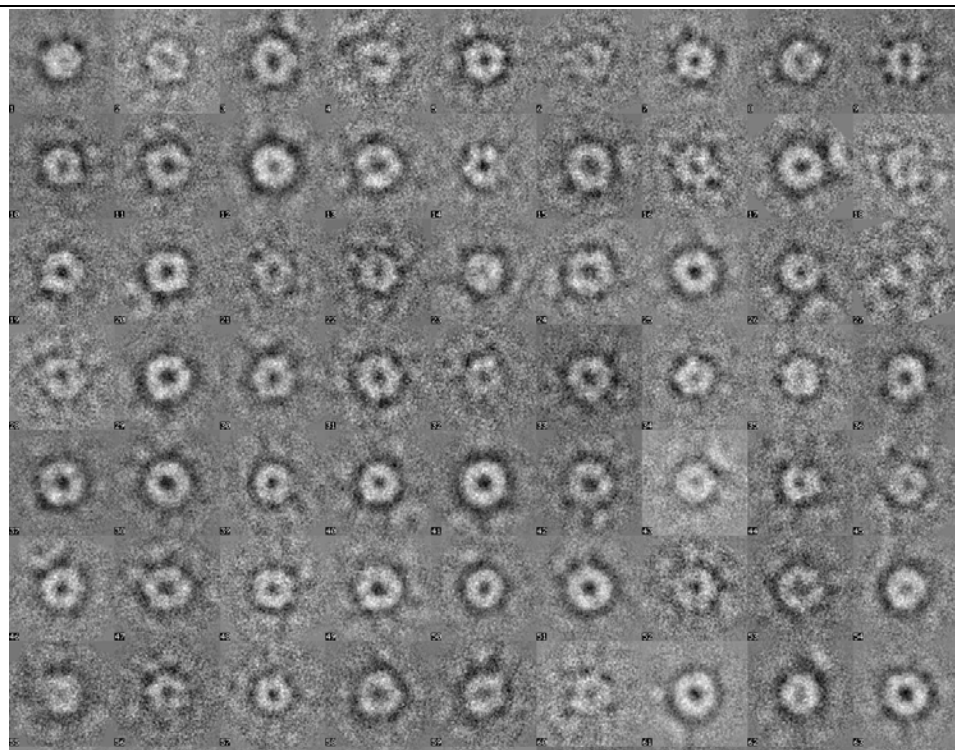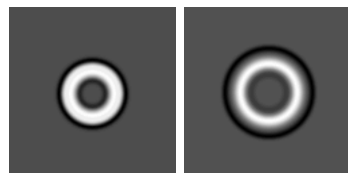

Supplement: pnas_0505062102_2.pdf [file pnas_0505062102_2.pdf]

**a**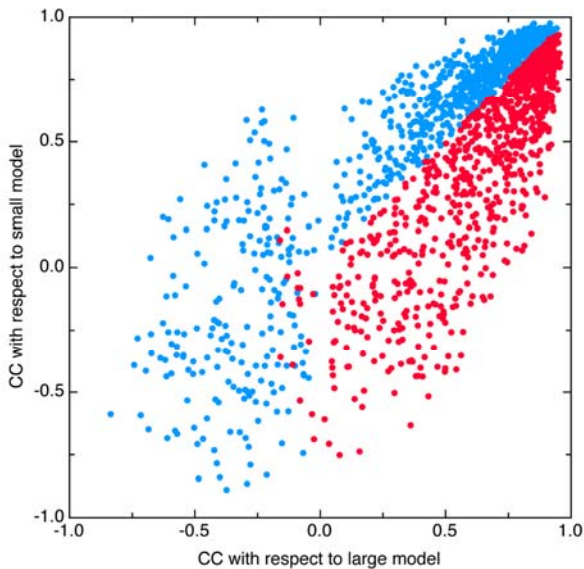**b**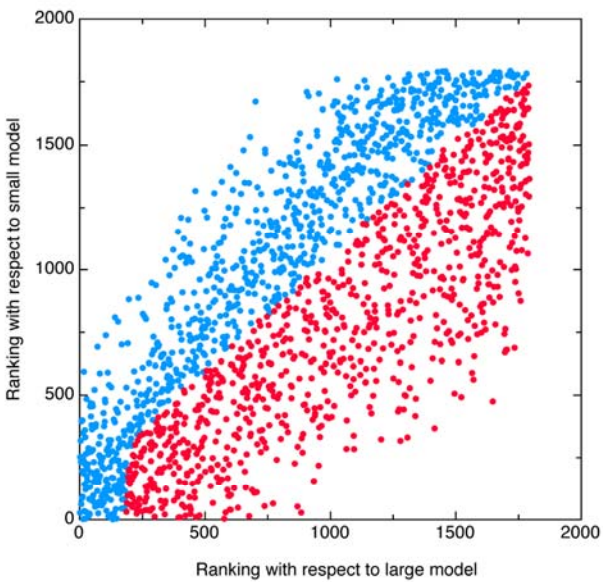

Supplement: pnas_0505062102_5.pdf [file pnas_0505062102_5.pdf]
